# Supplementary material for: Karyotype analysis of seven species of the tribe Lophiohylini (Hylinae, Hylidae, Anura), with conventional and molecular cytogenetic techniques
Source: PubMed Central journal article supplement (PMC3834569; doi:10.3897/compcytogen.v6i4.3945), 2012-12-03
Supplement: CompCytogen-006-409-s001.pdf [file CompCytogen-006-409-s001.pdf]

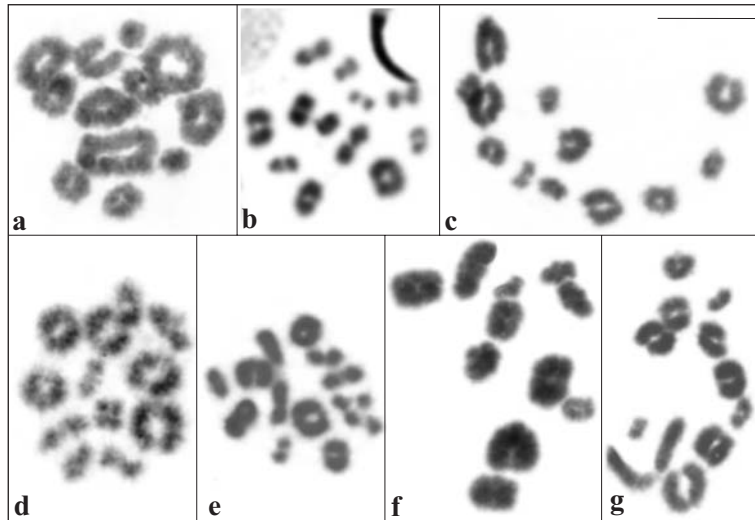

**Supplementary file 1.** Giemsa-stained metaphases I. **a.** *Aparasphenodon bokermanni*,  $2n = 24$ ; **b.** *Itapotihyla langsdorffii*,  $2n = 24$ ; **c.** *Trachycephalus* sp.,  $2n = 24$ ; **d.** *T. mesophaeus*,  $2n = 24$ ; **e.** *T. typhonius*,  $2n = 24$ ; **f.** *Phyllodytes edelmoi*,  $2n = 22$ . **g.** *P. luteolus*,  $2n = 22$ . Bar = 10  $\mu$ m.
